# Supplementary material
Source: PubMed Central journal article supplement (PMC5538628)
Supplement: EMBR-18-0-s001.pdf [file EMBR-18-0-s001.pdf]

## Expanded View Figures

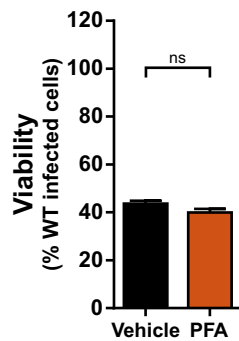

**Figure EV1. Murine cytomegalovirus DNA replication is not required for necroptosis in sensitive fibroblasts.**

Relative viability of 3T3-SA cells infected with M45mutRHIM compared to WT MCMV (MOI = 5) in the presence or absence of 200  $\mu$ g/ml phosphonoformic acid (PFA). n.s., not significant ( $P > 0.05$ ) by two-tailed unpaired Student's t-test. Error bars indicate SD ( $n = 3$  biological replicates).

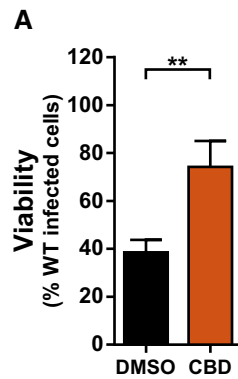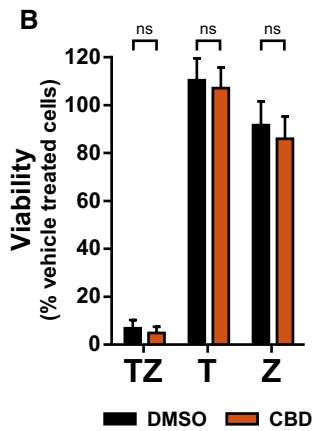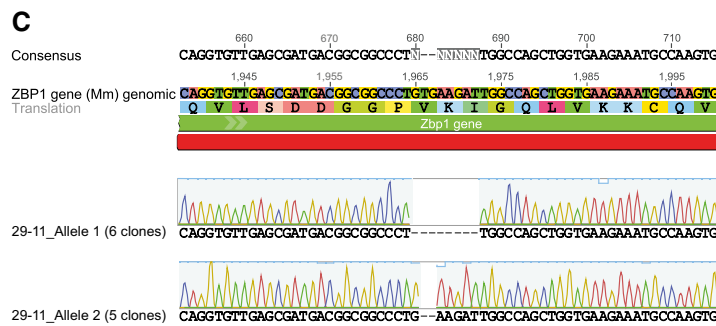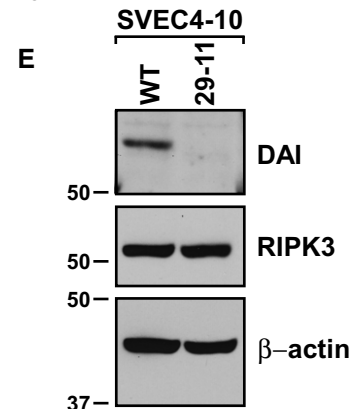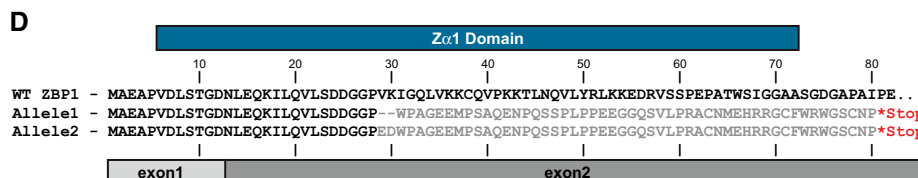

Figure EV2.

**Figure EV2. Ciliobrevin-D treatment protects from MCMV-induced necroptosis and characterization of DAI knockout 29-11 cell lines.**

- A Relative viability of SVEC4-10 cells infected with M45mutRHIM compared to WT MCMV (MOI = 5) in the presence or absence of 100 μM Ciliobrevin-D (CBD). \*\**P* < 0.01; two-tailed unpaired Student's *t*-test. Error bars indicate SD (*n* = 3 biological replicates).
- B Relative viability of SVEC4-10 cells treated with TNF (T), zVAD (Z), or TNF + zVAD-fmk (TZ) for 6 h in the presence or absence of 100 μM CBD. n.s., not significant (*P* > 0.05) by two-tailed unpaired Student's *t*-test. Error bars indicate SD (*n* = 3 biological replicates).
- C Representative results of sequencing and alignment of the DAI/ZBP1 exon 2 locus in 29-11 cells. Amplicons generated from 29-11 genomic DNA using ZBPSurveyor primers were cloned, and 11 independent clones sequenced.
- D Amino acid alignment of protein products predicted from the sequencing results in (C). Gray bars denote the boundaries of exon 1 (light) and exon 2 (dark) of DAI/ZBP1, and blue bar represents the defined Zα1 domain.
- E IB analysis to detect DAI/ZBP1, RIPK3, and β-actin from SVEC-10 parental and 29-11 cell lines.

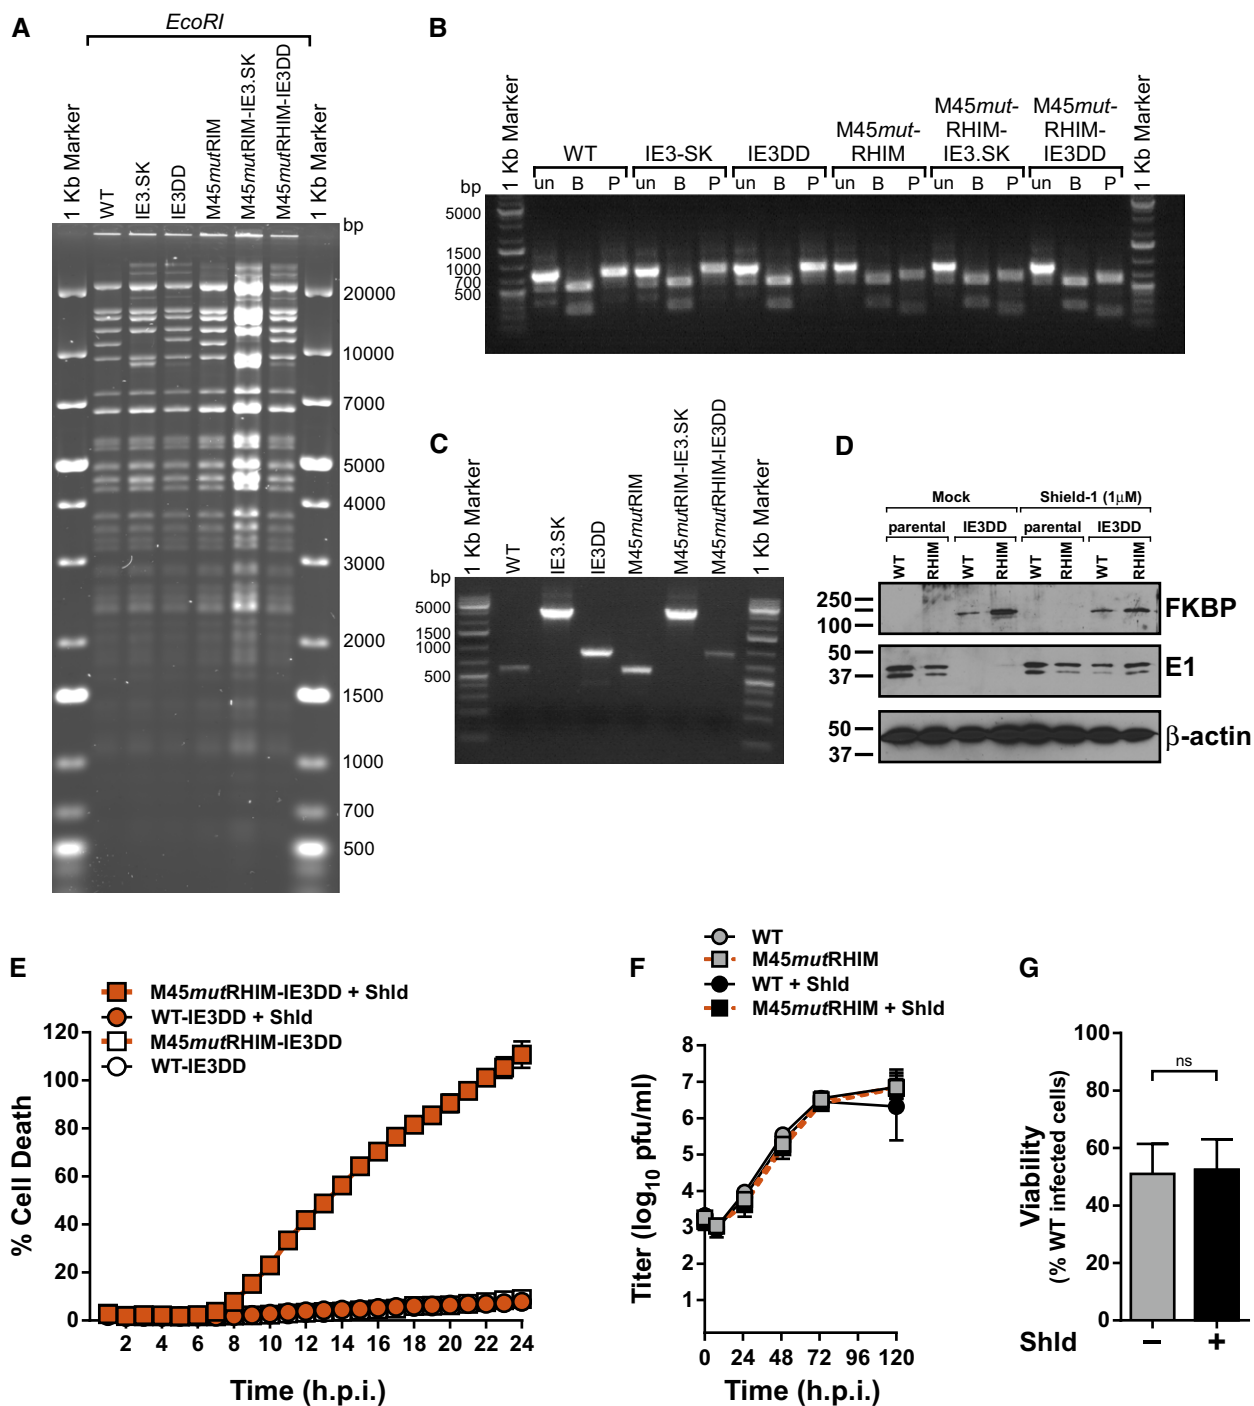

Figure EV3.

**Figure EV3. Generation and characterization of IE3-DD viruses.**

A RFLP analysis of parental WT, IE3.SK, IE3DD, parental M45mutRHIM, M45mutRHIM-IE3.SK, and M45mutRHIM-IE3DD bacmids digested with *EcoRI*.  
 B Agarose gel analysis of PCR amplicons generated from bacmids described in (A) with primers HS36 and HS37. Amplicons were digested with the indicated restriction endonuclease to diagnose the M45mutRHIM locus. un, undigested; B, *BamHI*; P, *PvuII*.  
 C Agarose gel analysis of PCR amplicons generated from bacmids described in (A) with primers HS09 and HS10 to diagnose insertions at the end of IE3 exon 5.  
 D IB analysis to detect the DD-domain (FKBP), E1, and  $\beta$ -actin from NIH3T3 cells infected 13 h with parental or IE3DD WT or M45mutRHIM (RHIM) MCMV (MOI = 1) in the presence or absence of 1  $\mu$ M Shield-1.  
 E Kinetics of cell death of 3T3-SA cells infected with WT or M45mutRHIM (MOI = 5) in the presence or absence of 1  $\mu$ M Shield-1 (Shld), measured in real time by Sytox green incorporation. Error bars indicate SD ( $n = 4$  biological replicates).  
 F Multistep replication levels of parental WT and M45mutRHIM viruses (MOI = 0.05) in NIH3T3 cells in the presence or absence of 1  $\mu$ M Shld. Error bars indicate SD ( $n = 3$  biological replicates).  
 G Relative viability of SVEC4-10 cells infected with M45mutRHIM compared to WT MCMV in the absence or presence of 1  $\mu$ M Shld. n.s., not significant ( $P > 0.05$ ) by two-tailed unpaired Student's *t*-test. Error bars indicate SD ( $n = 3$  biological replicates).

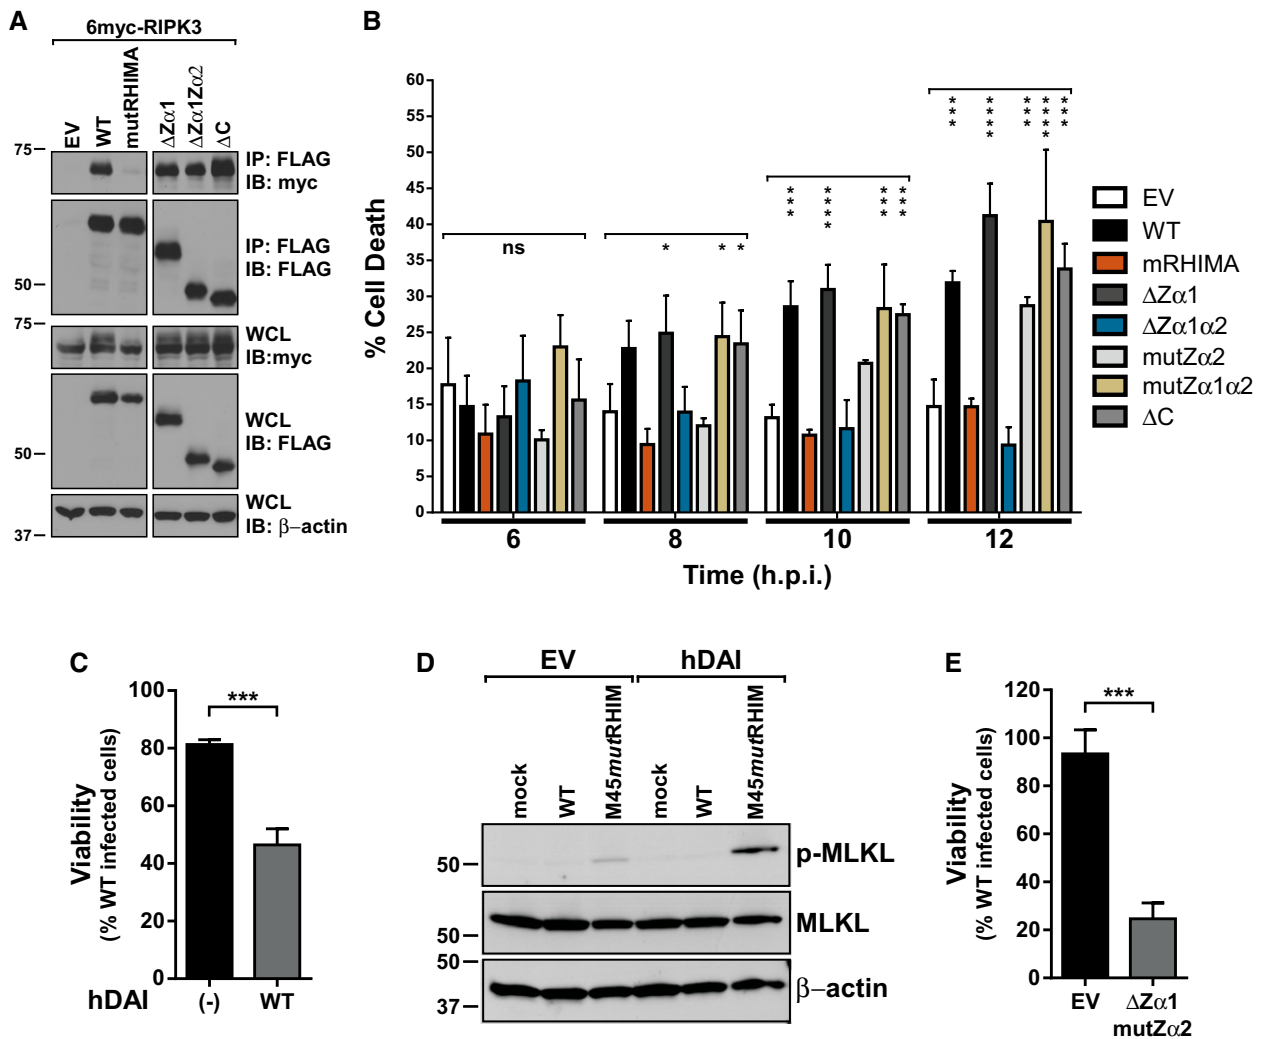

Figure EV4.

**Figure EV4. Mutation of DAI's RNA binding domain delays necroptosis, and human DAI can mediate necroptosis.**

- A Immunoprecipitation (IP) and IB analysis to detect FLAG-DAI/ZBP1, myc-RIPK3, and  $\beta$ -actin from 293T cells transfected with vectors expressing 6myc-RIPK3 and different 3XFLAG-DAI/ZBP1 constructs, and subjected to IP with anti-FLAG M2 agarose beads.
- B Cell death of DAI/ZBP1-reconstituted 29-11 cell lines infected with M45mutRHIM MCMV (MOI = 5); 6, 8, 10, and 12 h post-infection times were extracted from Fig 5D–F and replotted for clarity. \*\*\*\* $P < 0.0001$ ; \*\*\* $P < 0.001$ ; \* $P < 0.05$ ; n.s., not significant ( $P > 0.05$ ) by one-way ANOVA with Dunnett's multiple comparisons test, compared to EV. Error bars indicate standard deviation from the mean (SD;  $n = 4$  biological replicates).
- C Relative viability of HT-29 cells with or without hDAI expression infected with M45mutRHIM compared to WT MCMV. \*\*\* $P < 0.001$  by two-tailed unpaired Student's  $t$ -test. Error bars indicate SD ( $n = 3$  biological replicates).
- D IB analysis to detect p-MLKL, total MLKL, and  $\beta$ -actin from HT-29 cells with or without hDAI expression infected with WT or M45mutRHIM for 10 h.
- E Relative viability of 29-11 cells reconstituted with empty vector (EV) or DAI- $\Delta Z\alpha 1$ mutZ $\alpha 2$  infected with M45mutRHIM compared to WT MCMV. \*\*\* $P < 0.001$  by two-tailed unpaired Student's  $t$ -test. Error bars indicate SD ( $n = 3$  biological replicates).
