# Supplementary material
Source: PubMed Central journal article supplement (PMC5538628)

Figure 1A

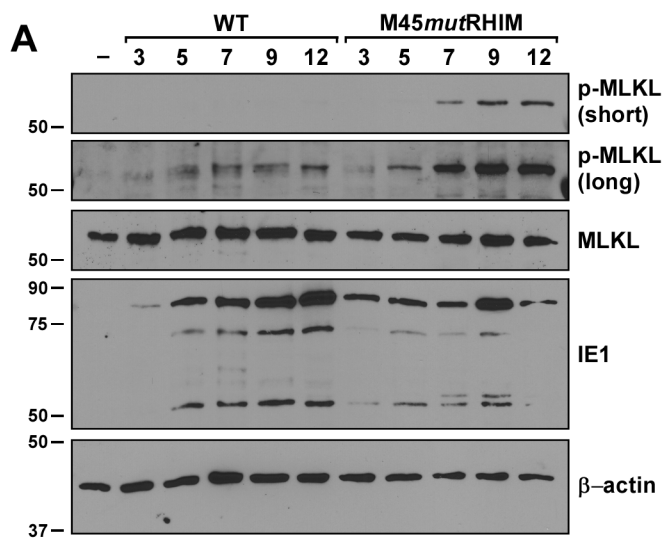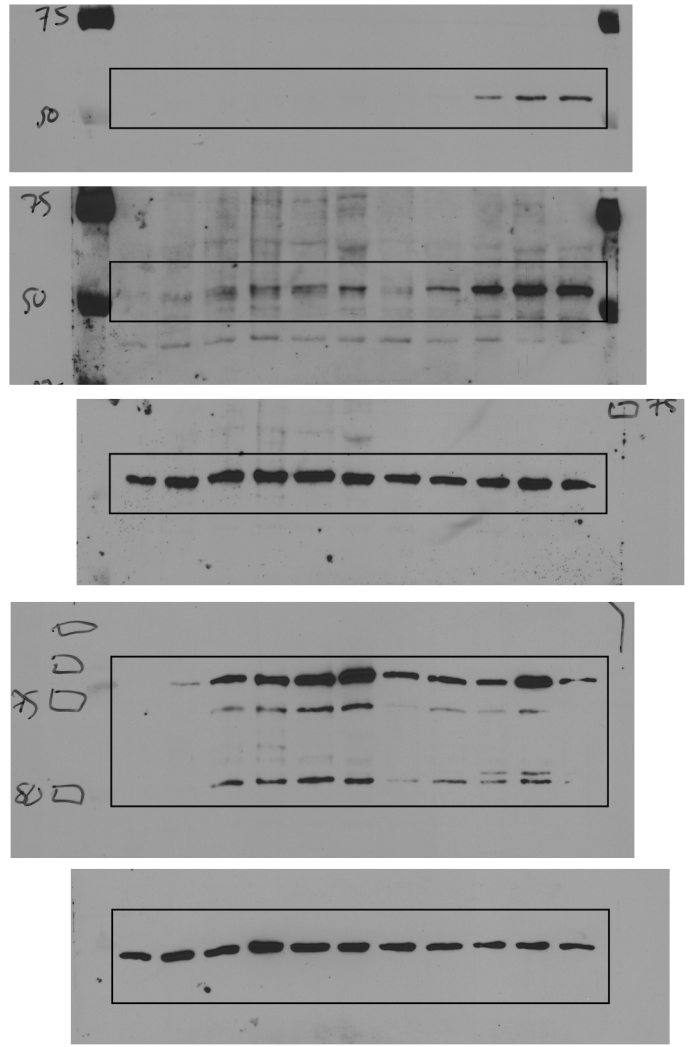

Supplement: EMBR-18-0-s003.pdf [file EMBR-18-0-s003.pdf]

Figure 2

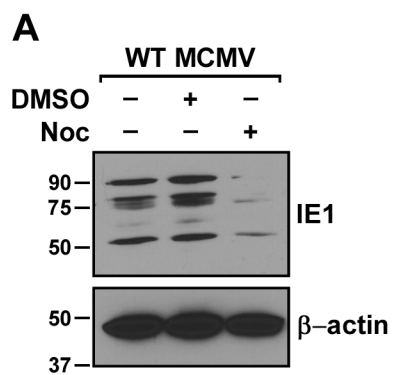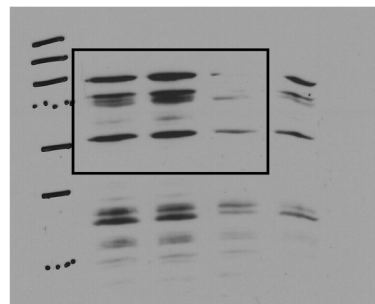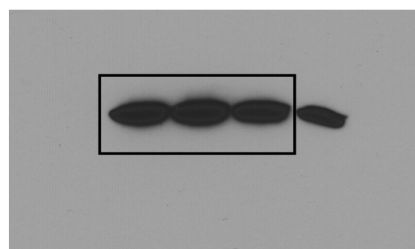

Supplement: EMBR-18-0-s004.pdf [file EMBR-18-0-s004.pdf]

Figure 2

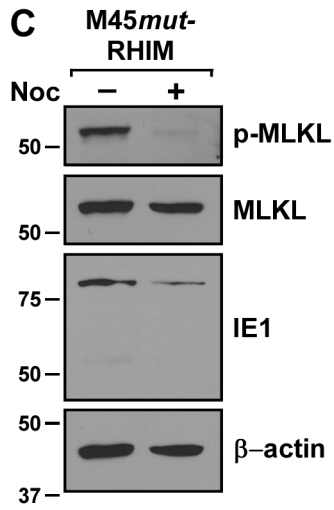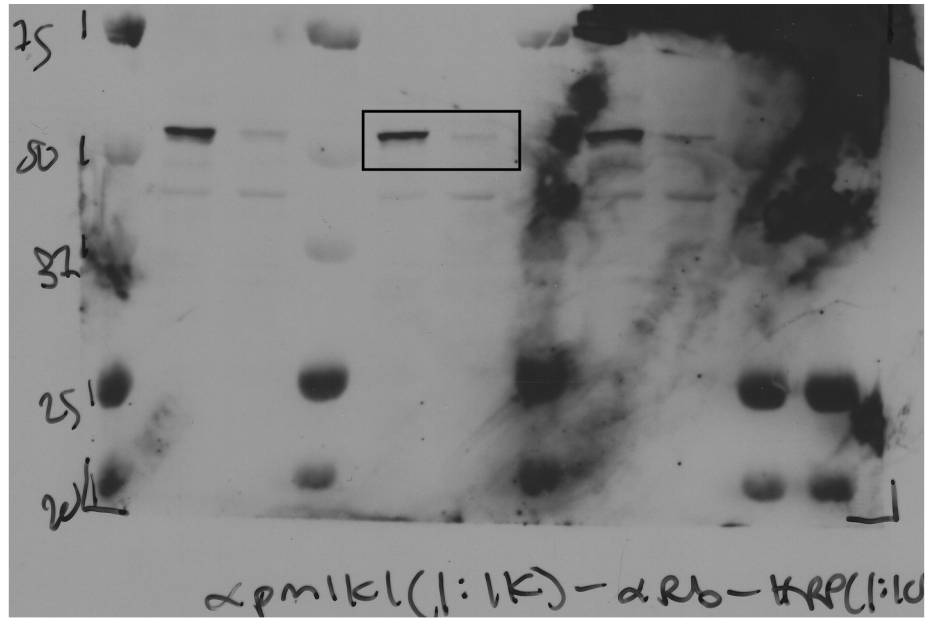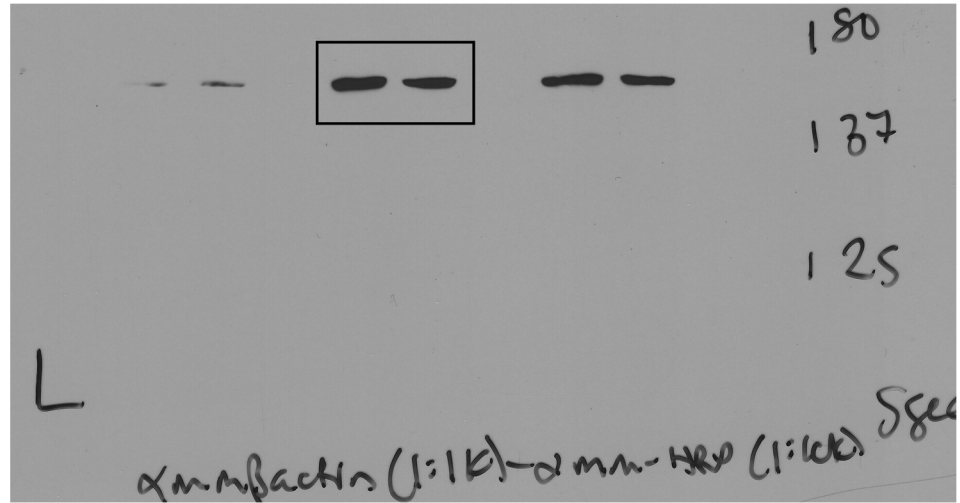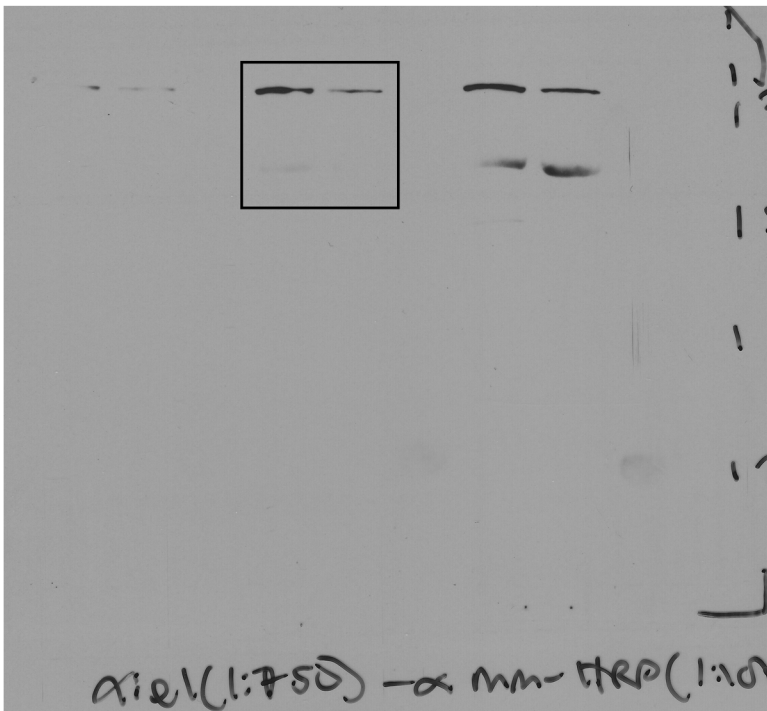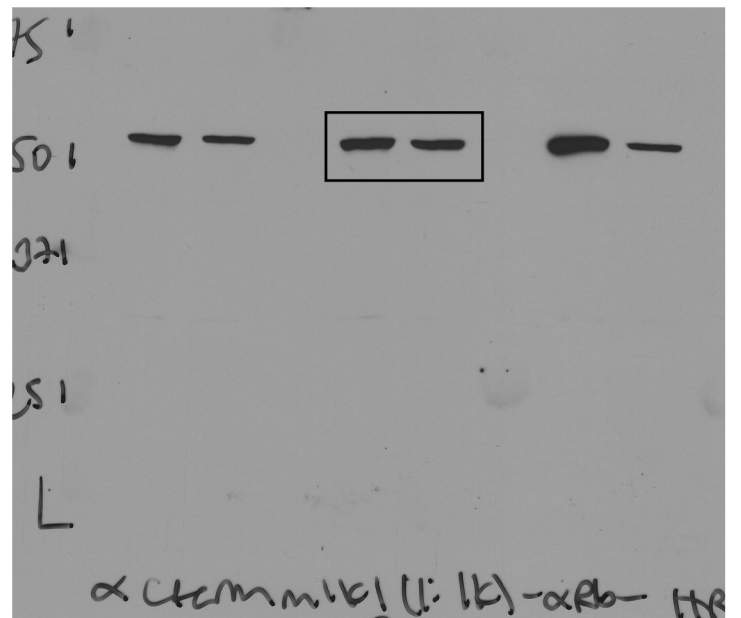

Supplement: EMBR-18-0-s005.pdf [file EMBR-18-0-s005.pdf]

Figure 2E

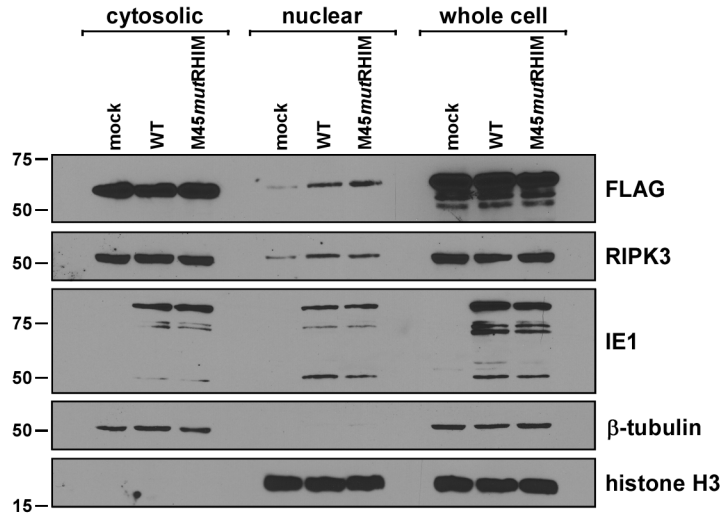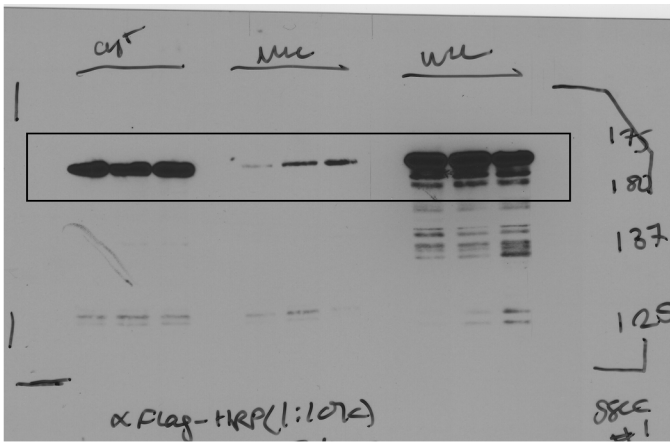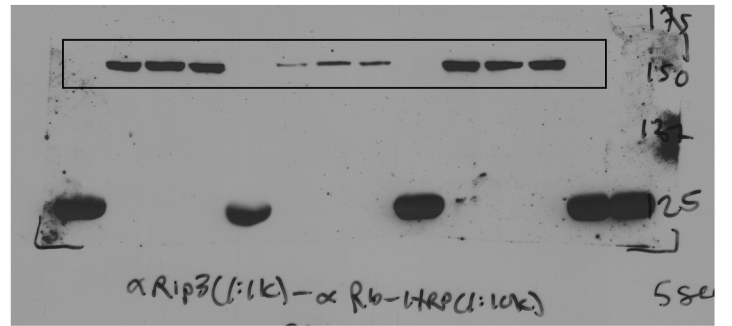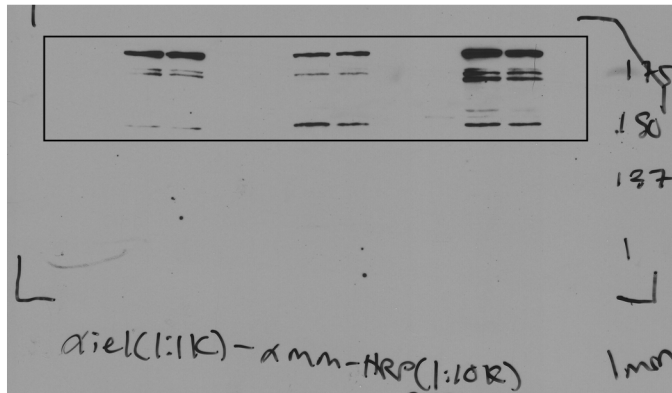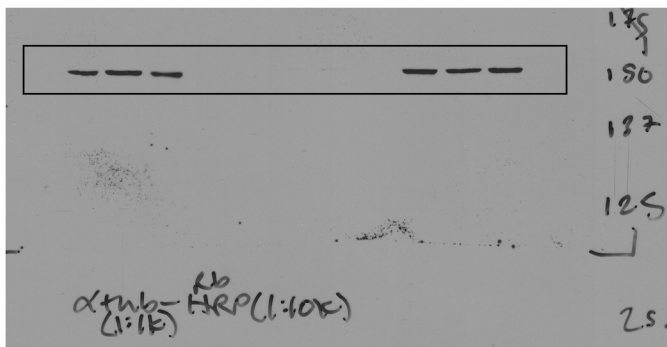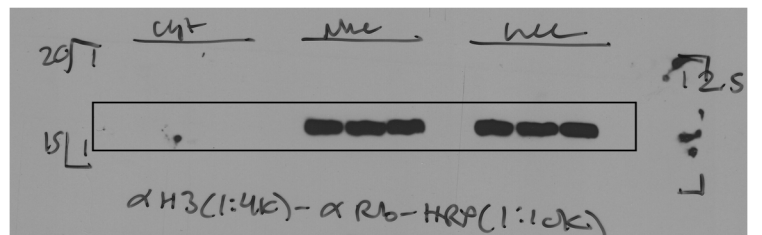

Supplement: EMBR-18-0-s006.pdf [file EMBR-18-0-s006.pdf]

Figure 3C

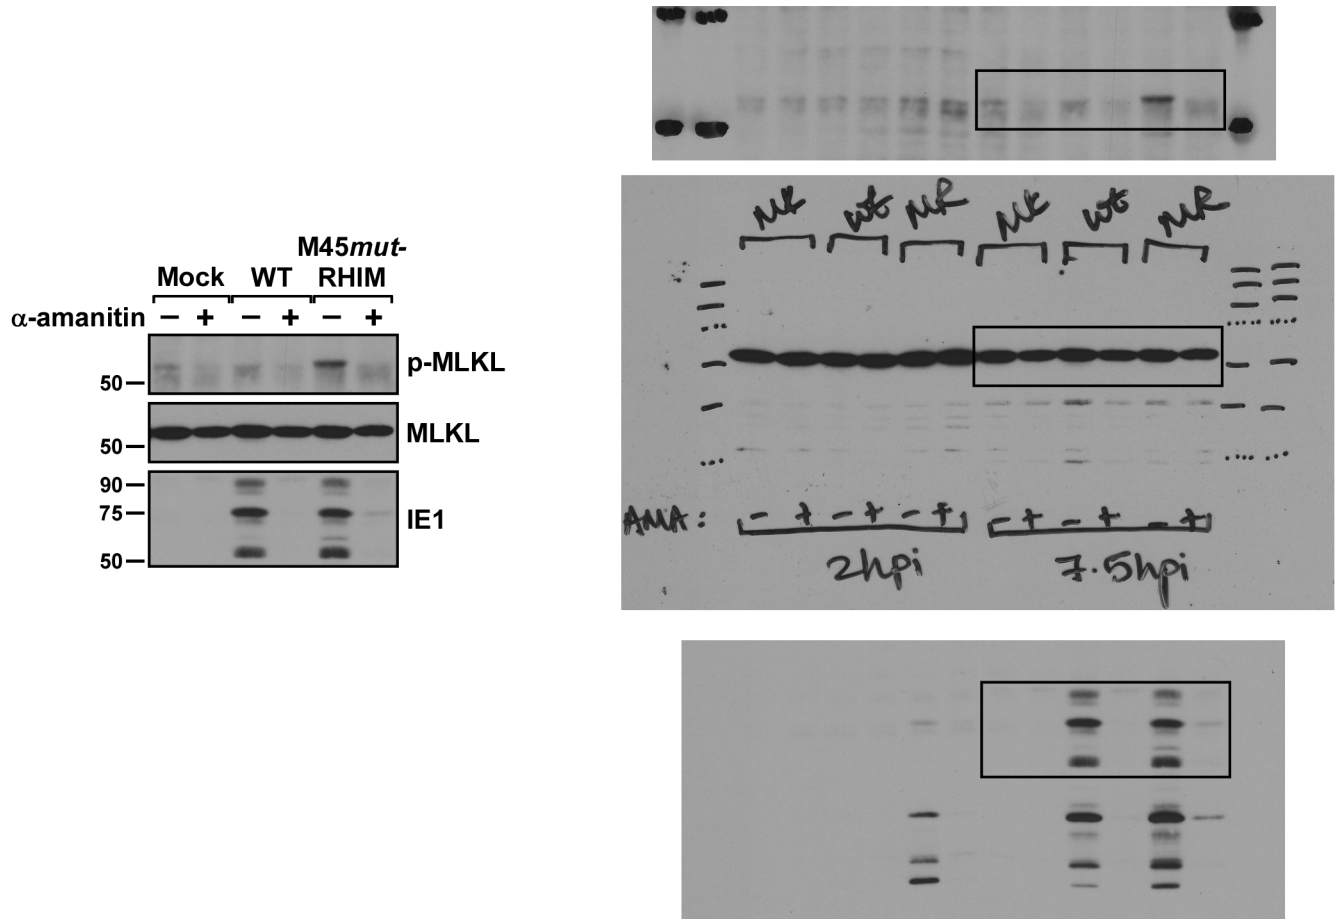

Supplement: EMBR-18-0-s007.pdf [file EMBR-18-0-s007.pdf]

Figure 3E

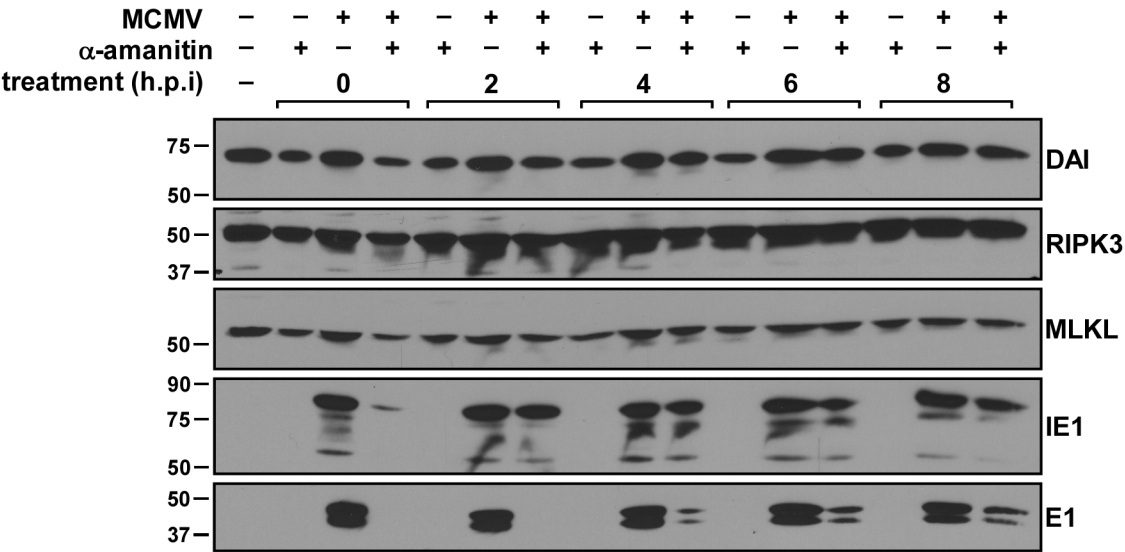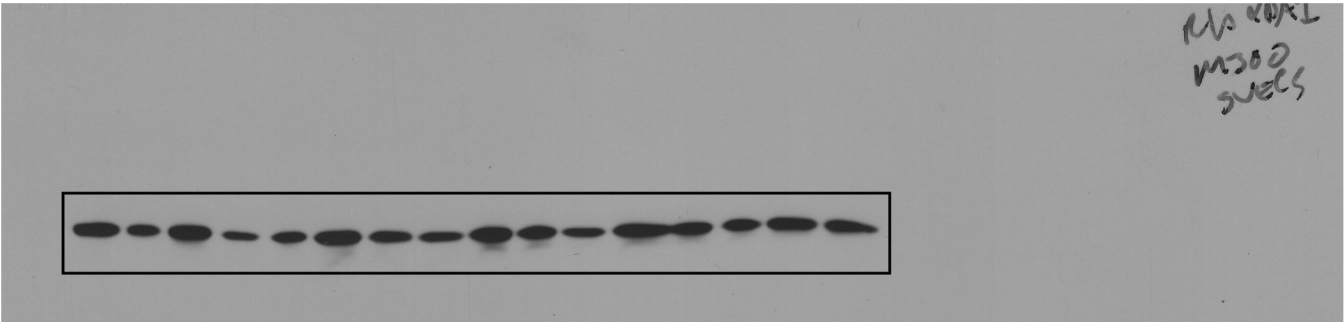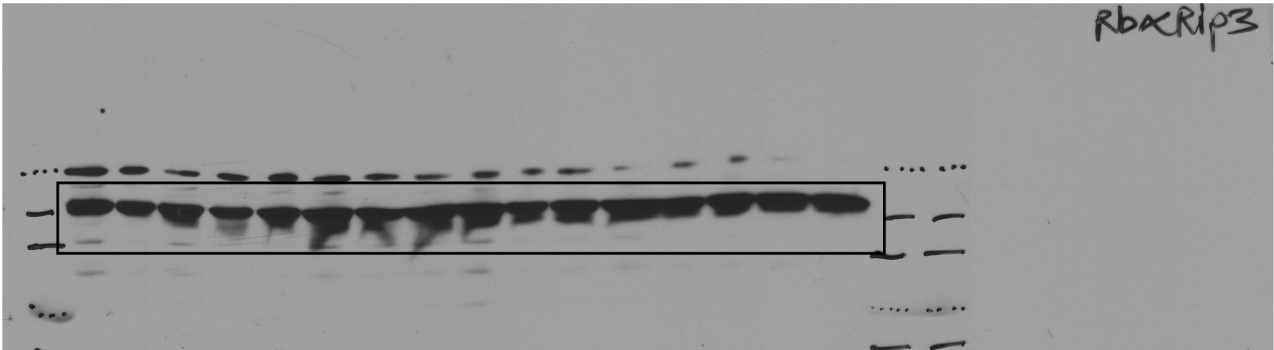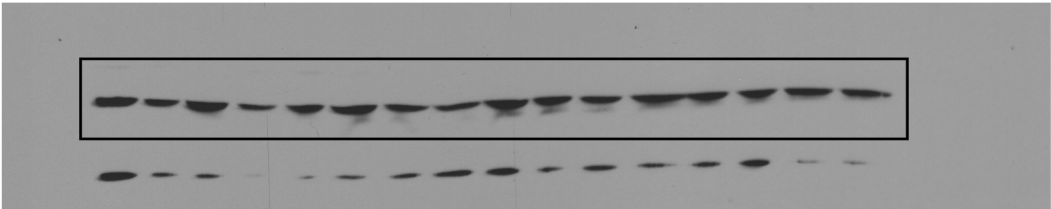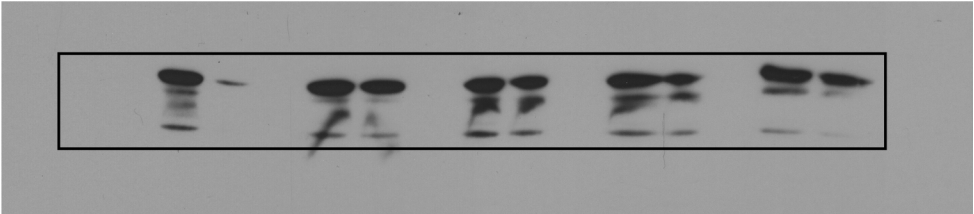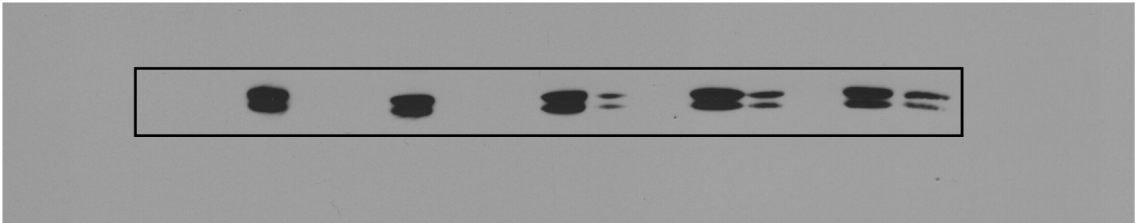

Supplement: EMBR-18-0-s008.pdf [file EMBR-18-0-s008.pdf]

Figure 5

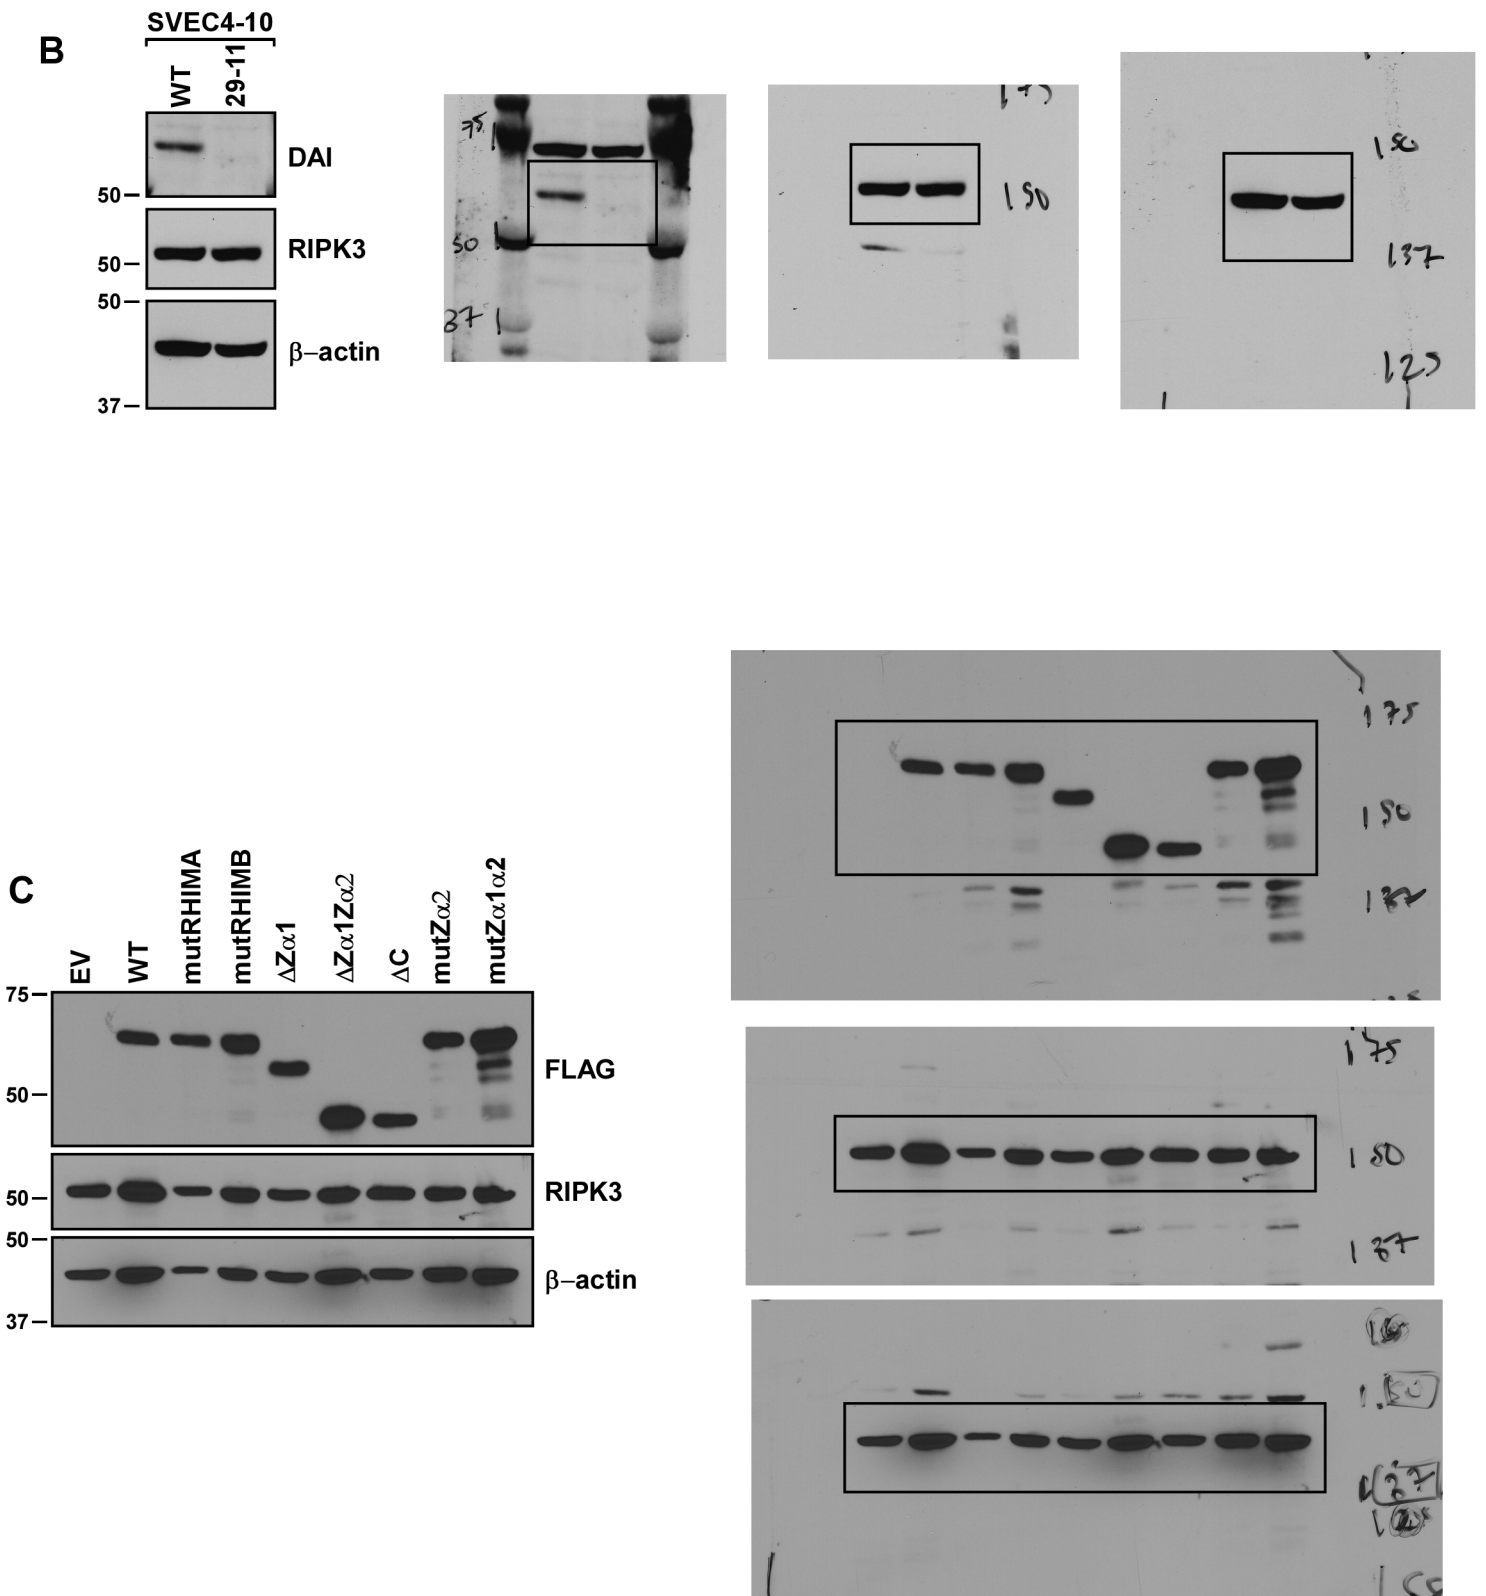

Supplement: EMBR-18-0-s009.pdf [file EMBR-18-0-s009.pdf]
